# Supplementary material
Source: PubMed Central journal article supplement (PMC4611515)
Supplement: ismej201567x1.pdf [file ismej201567x1.pdf]

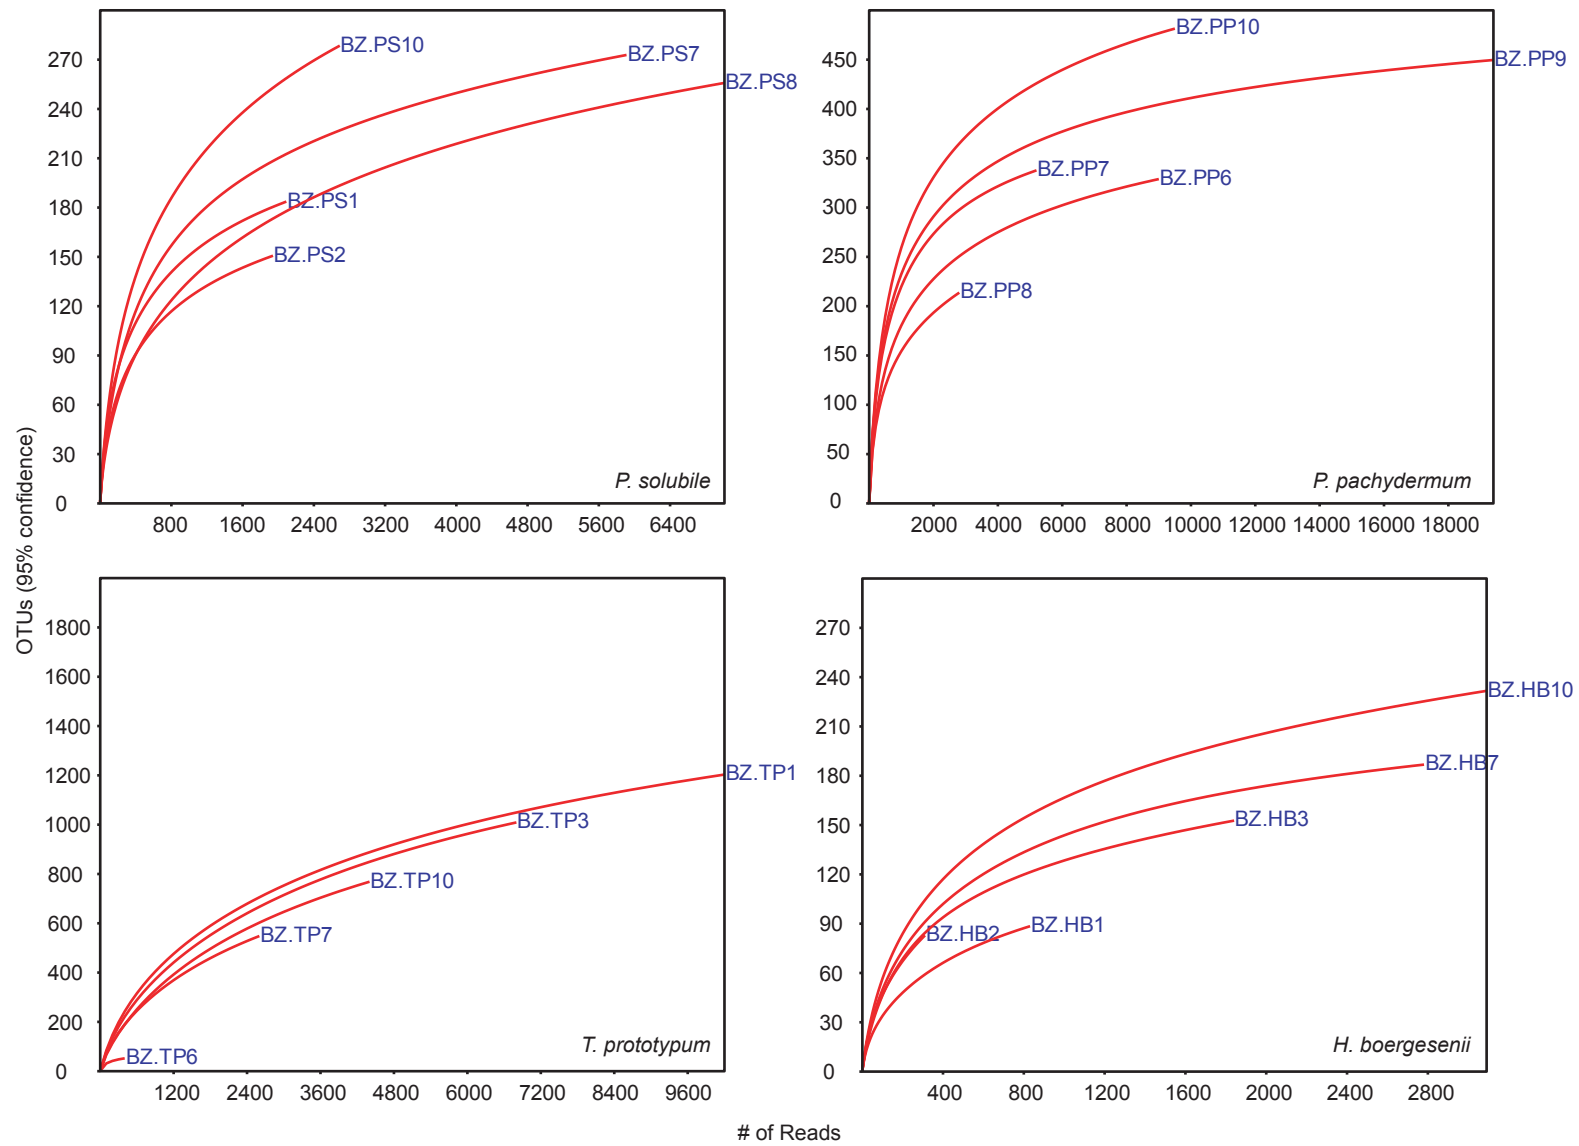

SI Figure 1. Rarefaction curves of CCA biofilm samples showing each of the five samples per CCA species.
