# Supplementary material
Source: PubMed Central journal article supplement (PMC4611515)

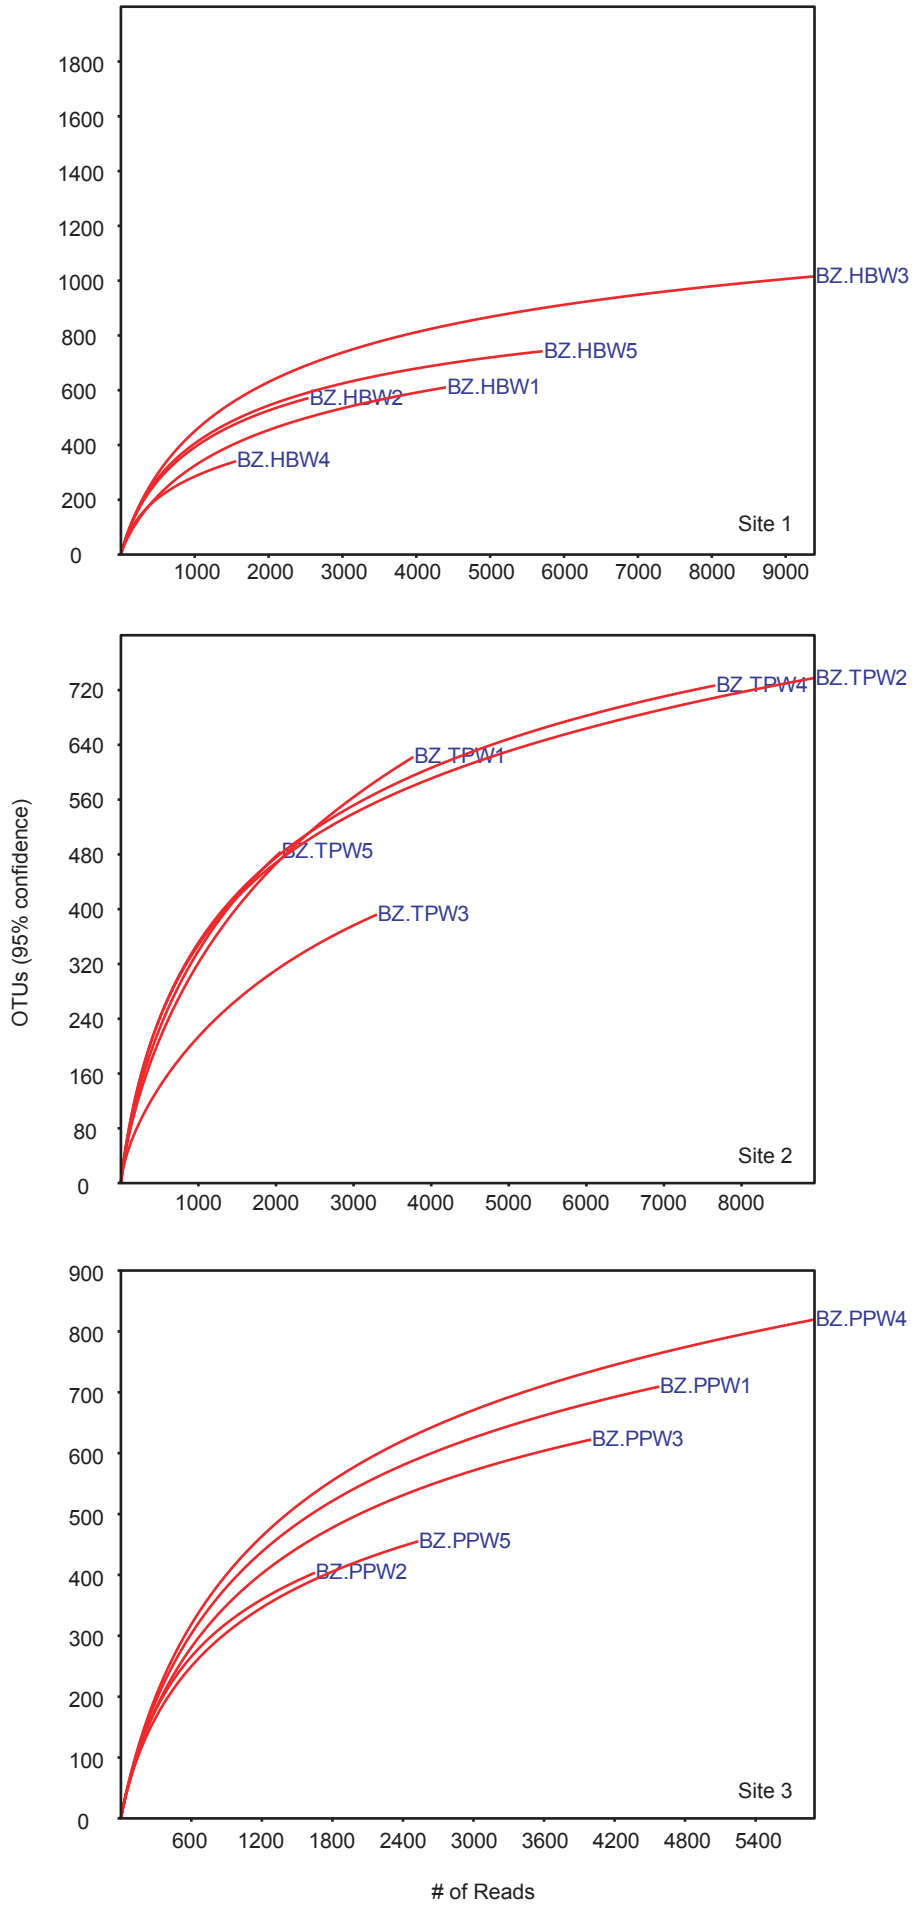

SI Figure 2. Rarefaction curves of seawater samples showing each of the five samples per site.

Supplement: ismej201567x2.pdf [file ismej201567x2.pdf]
